# Supplementary material
Source: publisher figshare collection journal article supplement (https://frontiersin.figshare.com/ndownloader/files/14994302)
Supplement: Supplementary file [file 14994302]

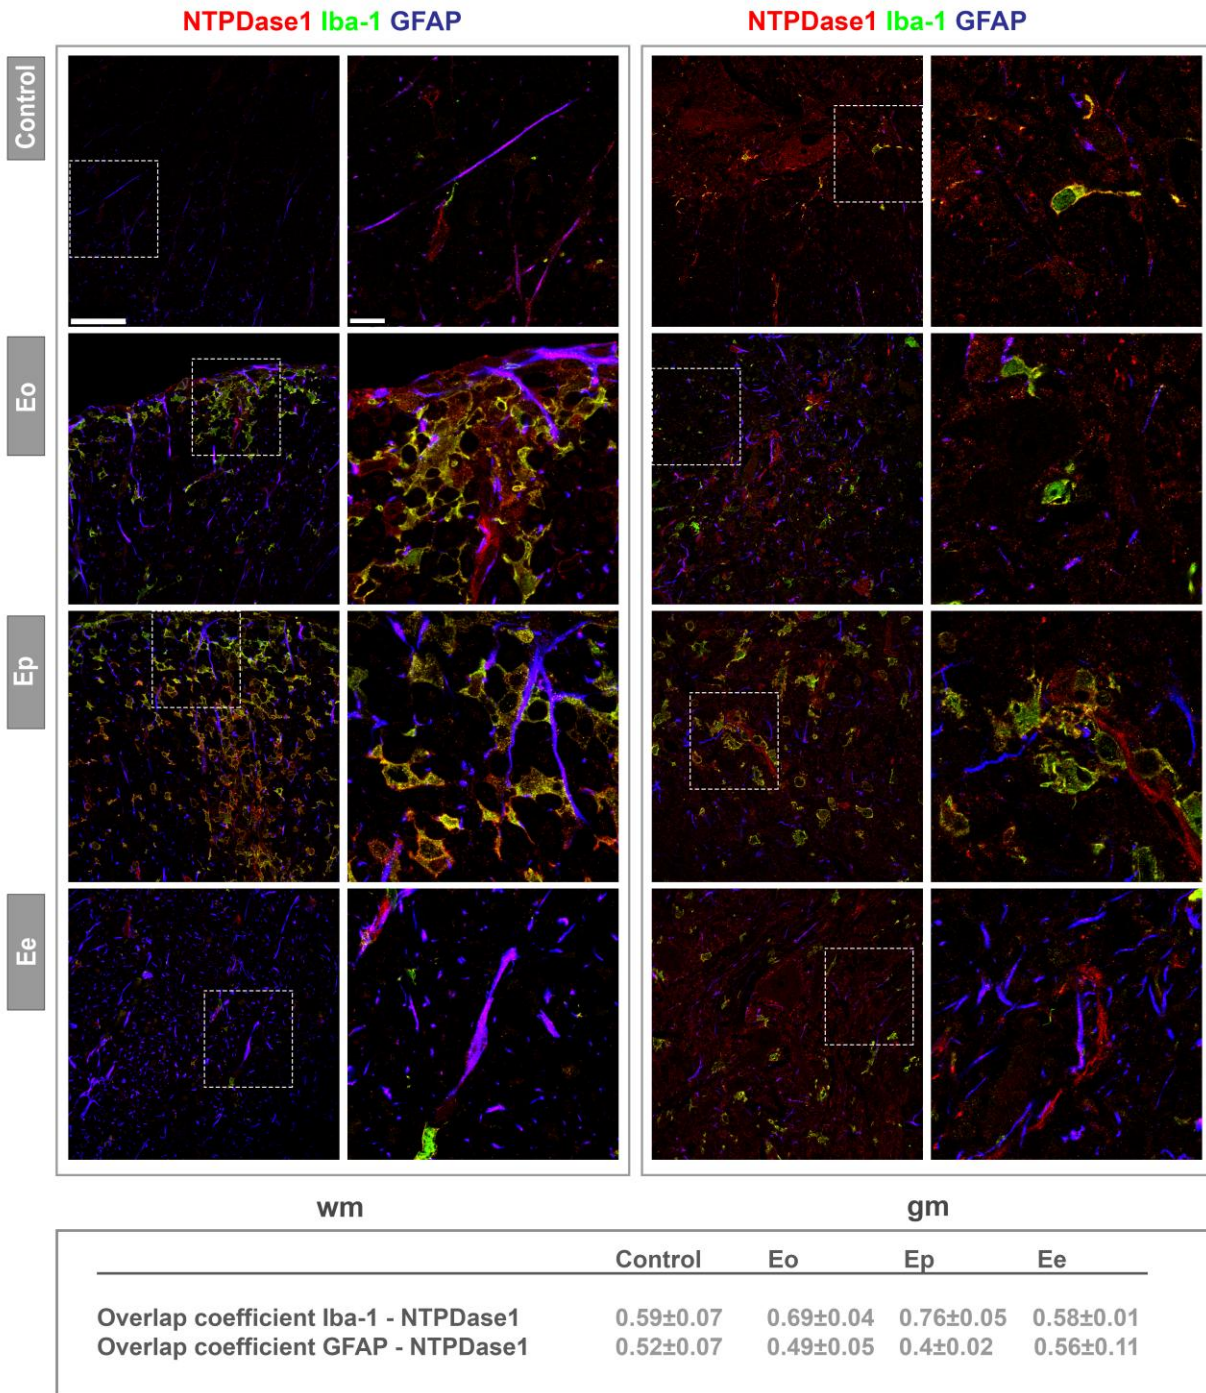

**Supplementary Fig. 1.** Expression of NTPDase1 by microglia/macrophages and astrocytes analyzed by confocal microscopy. Representative low-power (scale bar=50µm) and high-power (scale bar=10µm) micrographs of spinal cord cross-sections from white matter (wm) and gray matter (gm), respectively, showing triple immunofluorescence labeling directed to

NTPDase1 (*red fluorescence*), Iba1 (*green fluorescence*) and GFAP (*blue fluorescence*). Micrographs from control and EAE animals were obtained by Leica confocal microscope TCS MP5. The degree of GFAP/NTPDase1 and Iba-1/NTPDase1 overlap were analyzed by Leica Microsystems LAS AF TCS MP5 Software®. Overlap coefficients presented as mean  $\pm$  SEM are shown in the table.
